# Supplementary material for: Bis-tris propane as a new multidentate ligand for nickel- and cobalt-based spin clusters
Source: Royal Society of Chemistry journal article supplement (doi:10.1039/c0dt01090a), 2010-11-26
Supplement: c0dt01090a.pdf [file c0dt01090a.pdf]

Supporting information for manuscript:

'Bis-tris propane as a new multidentate ligand for nickel- and cobalt-based spin clusters.'

Alan Ferguson, Marc Schmidtman, Euan K. Brechin and Mark Murrie

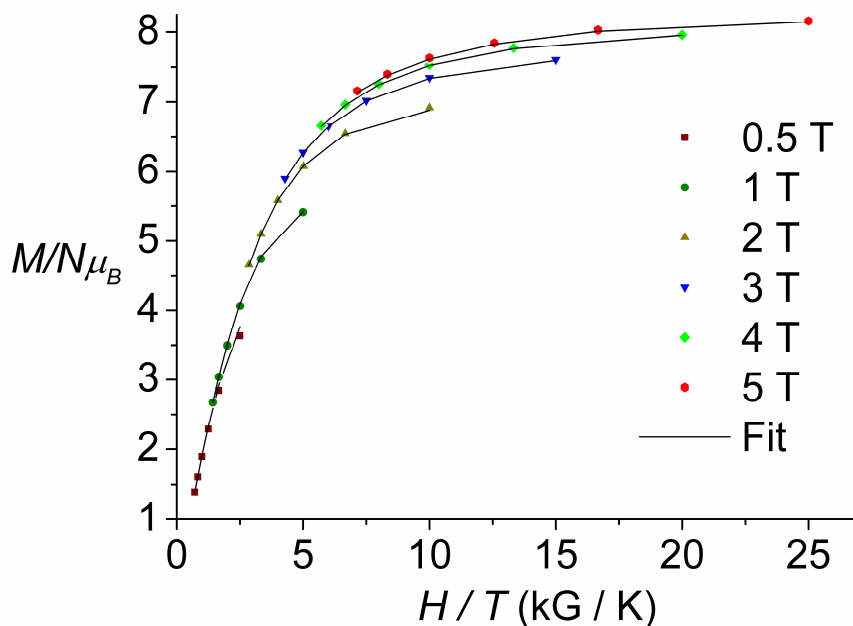

**Fig. S1** Reduced magnetisation ( $M/N\mu_B$ ) vs.  $H/T$  for  $\text{Ni}_4(\text{H}_4\text{L})(\text{H}_3\text{L})(\text{acac})_2[\text{OAc}]$  **1** (the solid lines show the fits). The best fit gave a spin ground state of  $S = 4$  with  $g = 2.11$  and  $D = -0.41 \text{ cm}^{-1}$ .

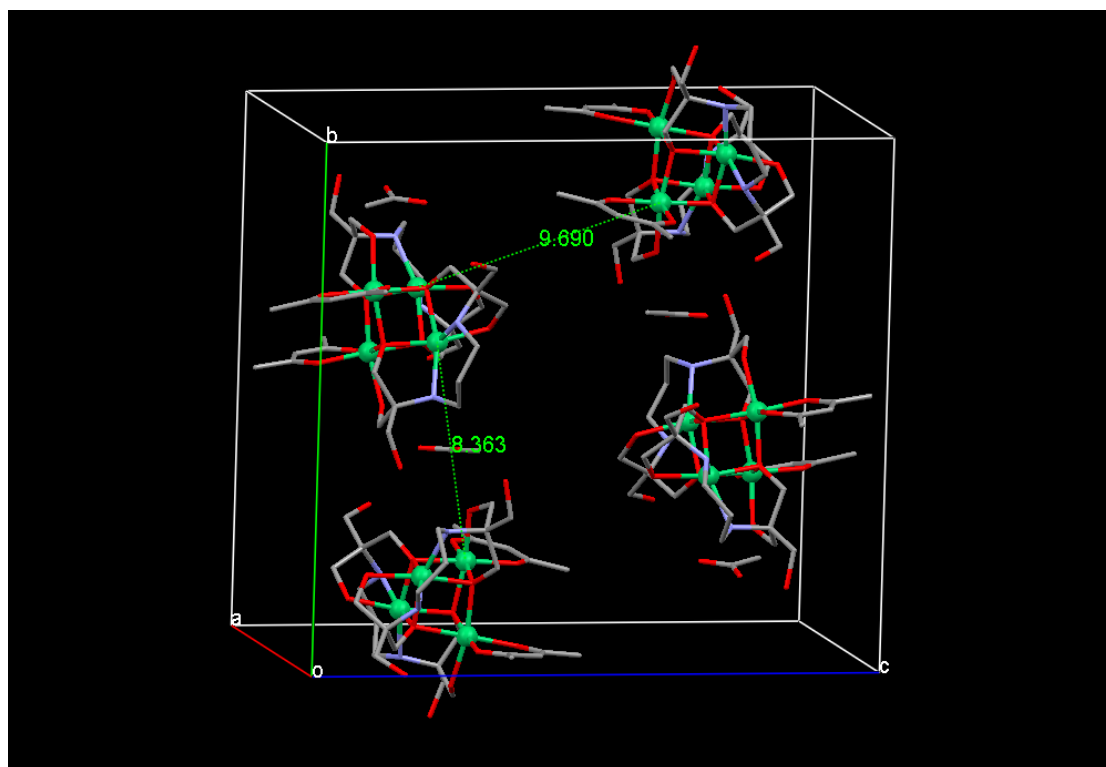

**Fig. S2** Crystal packing diagram for  $[\text{Ni}_4(\text{H}_4\text{L})(\text{H}_3\text{L})(\text{acac})_2][\text{OAc}]$  **1** (H atoms and solvent omitted for clarity). Ni-Ni intermolecular distances given in Å.

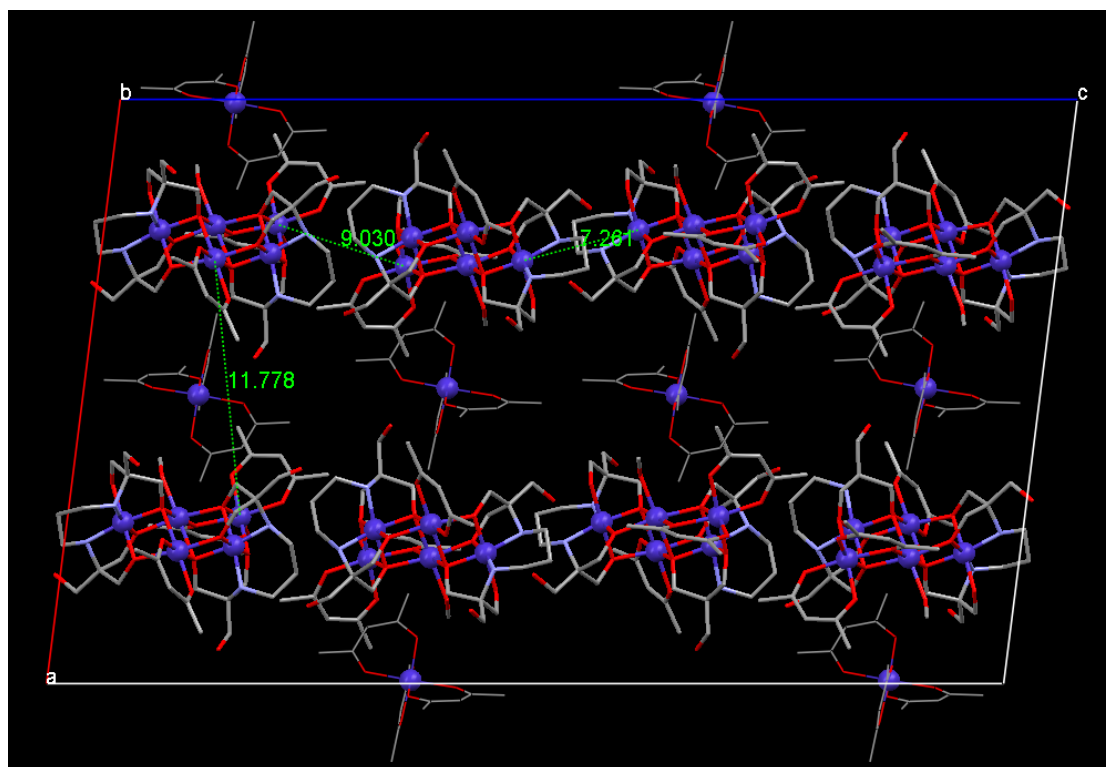

**Fig. S3** Crystal packing diagram for  $[\text{Co}^{\text{II}}_3\text{Co}^{\text{III}}_2(\text{H}_2\text{L})_2(\text{acac})_3(\text{MeOH})][\text{Co}^{\text{II}}(\text{acac})_3] \cdot 2$  (H atoms and solvent omitted for clarity). Co-Co intermolecular distances given in Å.
